# Supplementary material
Source: bioRxiv or medRxiv preprint supplement (https://www.biorxiv.org/highwire/filestream/108602/field_highwire_adjunct_files/0/178806-1.pdf)
Supplement: Supplementary file [file 178806-1.pdf]

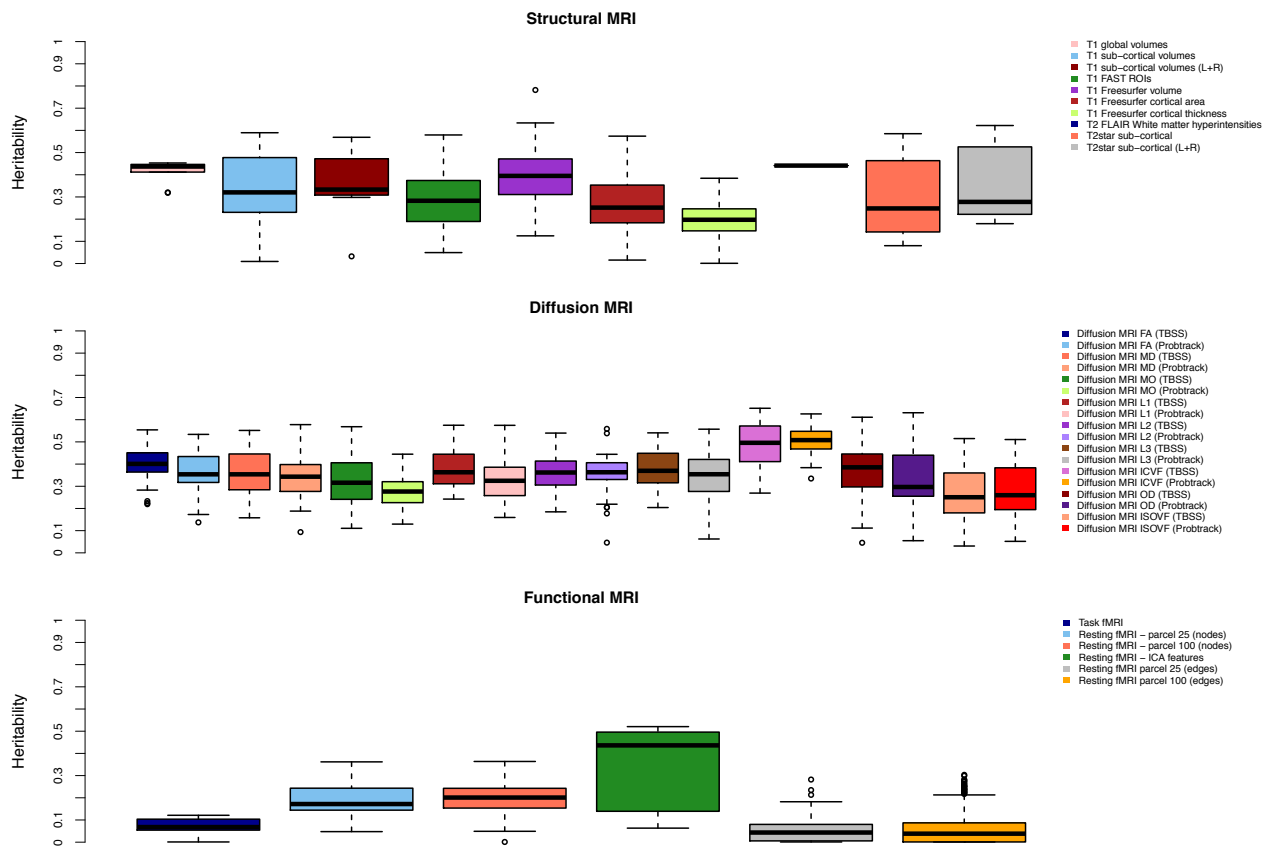

**Supplementary Figure 1 : Estimated heritability of IDPs.** Boxplots of estimated heritability (y-axis) for different IDP groups. IDPs have been split into three broad groups : Structural MRI (top), Diffusion MRI (middle) and Functional MRI (bottom). Boxplots are colored according to IDP groups.
